# Supplementary material for: Biosynthesised Silver Nanoparticles Loading onto Biphasic Calcium Phosphate for Antibacterial and Bone Tissue Engineering Applications
Source: MDPI journal article supplement (doi:10.3390/antibiotics11121780), 2022-12-08
Supplement: s1 [file s1]

**Table S1** polydispersity index

| S. No | Sample       | Mean<br>(nm) | S.D(nm) | PdI   | Dispersive<br>medium |
|-------|--------------|--------------|---------|-------|----------------------|
| 1.    | HAP          | 391.6nm      | 77.3nm  | 0.197 | Monodispersive       |
| 2.    | $\beta$ -TCP | 276.4nm      | 22.8nm  | 0.082 | Monodispersive       |
| 3.    | BCP          | 222.5nm      | 21.3nm  | 0.095 | Monodispersive       |
| 4.    | Ag-BCP       | 93.9         | 7.4nm   | 0.078 | Monodispersive       |
